# Supplementary material for: Co-targeting myelin inhibitors and CSPGs markedly enhances regeneration of GDNF-stimulated, but not conditioning-lesioned, sensory axons into the spinal cord
Source: eLife. 2021 May 4;10:e63050. doi: 10.7554/eLife.63050 (PMC8139830; doi:10.7554/eLife.63050)
Supplement: Figure 2—source data 1. — This Excel file contains raw data used for quantitative analysis shown in Figure 2F. The following figure supplements are available for Figure 2. [file elife-63050-fig2-data1.xlsx]

## Sheet: Fig2F source data
	Line Profile									100um within CNS		200um within CNS						300um within CNS					400um within CNS					500um within CNS
Experimental groups	Within dorsal roots		Thickness of dorsal root	AAV labeling efficiency	Average of AAV labeling efficiency	Multiplier	100um within CNS territory (GFAP boundary as 0)	100um within CNS territory (normalized)	ratio of axon 100um within CNS to DR	100um within CNS (average)	STDEV (100um)	200um within CNS territory	200um within CNS (normalized)	ratio of axons 200um within CNS to DR	200um within CNS (average)	STDEV	300um within CNS territory	300um within CNS (normalized)	ration of axons 300um within CNS to DR	300um within CNS (average)	STDEV (300um)	400um within CNS territory	400um within CNS (normalized)	ration of axons 400um within CNS to DR	400um within CNS (average)	STDEV (400um)	500um within CNS territory	500um within CNS (normalized)	ration of axons 500um within CNS to DR	500um within CNS (average)	STDEV (500um)
C57BL/6
C57 mouse 646 Slide 12 section3	6		44	0.136364	1.0697		0	0	0	0.0551268	0.0686849	0	0	0	0	0	0	0	0	0	0	0	0	0	0	0	0	0	0	0	0
C57 mouse 646 Slide 17 section 2	7		35	0.2	0.152814	1.0756	1	1.0756	0.153657		0.0190498	0	0	0		0	0	0	0			0	0	0			0	0	0
C57 mouse 646 Slide 31 section 1	8		54	0.148148			1	1.0756	0.134449		0.690849	0	0	0		0.083707	0	0	0		0.0412347	0	0	0			0	0	0
C57 mouse 646 Slide 33 section 1	11		75	0.146667			1	1.0756	0.0977815			0	0	0			0	0	0			0	0	0			0	0	0
C57 mouse 646 Slide 16 section 1	7		41	0.170732			0	0	0			0	0	0			0	0	0			0	0	0			0	0	0
C57 mouse 646 Slide 13 section 3	7		44	0.159091			0	0	0			0	0	0			0	0	0			0	0	0			0	0	0
C57 mouse 646 Slide 34 section 3	10	8	92	0.108696			0	0	0			0	0	0			0	0	0			0	0	0			0	0	0
C57 mouse 647 Slide 10 section 3	7		53	0.132075	0.841163		1	1.17242	0.167488	0.0847593		0	0	0			0	0	0			0	0	0			0	0	0
C57 mouse 647 Slide 15 section 1	11		62	0.177419	0.140194	1.17242	0	0	0			0	0	0			0	0	0			0	0	0			0	0	0
C57 mouse 647 Slide 28 section 2	10		90	0.111111			1	1.17242	0.117242			0	0	0			0	0	0			0	0	0			0	0	0
C57 mouse 647 Slide 14 section 1	10		70	0.142857			1	1.17242	0.117242			0	0	0			0	0	0			0	0	0			0	0	0
C57 mouse 647 Slide 13 section 2	11		69	0.15942			1	1.17242	0.106584			0	0	0			0	0	0			0	0	0			0	0	0
C57 mouse 647 Slide 30 section 2	11	10	93	0.11828			0	0	0			0	0	0			0	0	0			0	0	0			0	0	0
C57 + GDNF
mouse 850 14-2	7		37	0.189189	1.31493		7	7	1	0.493304	0.226902	3	3	0.428571	0.223214	0.363455	2	2	0.285714	0.136161	0.270195	2	2	0.285714	0.0714286	0.15146	0	0	0	0	0.0635663
mouse 850 20-2	8		52	0.153846	0.164366	1	5	5	0.625		0.0585858	1	1	0.125		0.0938437	1	1	0.125		0.069764	0	0	0		0.0391069	0	0	0		0.0164127
mouse 850 12-1	8		35	0.228571			2	2	0.25			1	1	0.125			1	1	0.125			0	0	0			0	0	0
mouse 850 12-3	8		46	0.173913			4	4	0.5			2	2	0.25			1	1	0.125			0	0	0			0	0	0
mouse 850 15-3	7		52	0.134615			3	3	0.428571			1	1	0.142857			0	0	0			0	0	0			0	0	0
mouse 850 16-3	7		52	0.134615			3	3	0.428571			1	1	0.142857			2	2	0.285714			1	1	0.142857			0	0	0
mouse 850 18-2	7		58	0.12069			3	3	0.428571			2	2	0.285714			1	1	0.142857			1	1	0.142857			0	0	0
mouse 850 23-1	7		39	0.179487			2	2	0.285714			2	2	0.285714			0	0	0			0	0	0			0	0	0
mouse 851 4-1	8		43	0.186047	0.93966		2	2.44889	0.306111	0.343594		4	4.89778	0.612222	0.683023		4	4.89778	0.612222	0.449796		2	2.44889	0.306111	0.181168		1	1.22444	0.153055	0.0510185
mouse 851 6-1	6		41	0.146341	0.134237	1.22444	3	3.67333	0.612222			7	8.57111	1.42852			4	4.89778	0.816296			1	1.22444	0.204074			0	0	0
mouse 851 9-2	7		63	0.111111			2	2.44889	0.349841			2	2.44889	0.349841			4	4.89778	0.699682			2	2.44889	0.349841			0	0	0
mouse 851 12-3	6		50	0.12			1	1.22444	0.204074			3	3.67333	0.612222			3	3.67333	0.612222			2	2.44889	0.408148			1	1.22444	0.204074
mouse 851 14-1	6		46	0.130435			0	0	0			2	2.44889	0.408148			1	1.22444	0.204074			0	0	0			0	0	0
mouse 851 16-2	7		52	0.134615			3	3.67333	0.524762			2	2.44889	0.349841			0	0	0			0	0	0			0	0	0
mouse 851 17-3	6		54	0.111111			2	2.44889	0.408148			5	6.12222	1.02037			1	1.22444	0.204074			0	0	0			0	0	0
C57 + GDNF + ChABC
mouse 979 14-2	7		47	0.148936	0.558839		2	2.35296	0.336138	0.367651	0.218037	1	1.17648	0.168069			0	0	0	0	0.0477613	0	0	0	0	0	0	0	0	0	0
mouse 979 14-3	7		49	0.142857	0.13971	1.17648	4	4.70593	0.672275		0.0824104	1	1.17648	0.168069		0	0	0	0		0.0180521	0	0	0			0	0	0
mouse 979 17-3	7		48	0.145833			1	1.17648	0.168069			1	1.17648	0.168069			0	0	0			0	0	0			0	0	0
mouse 979 27-3	8	7.25	66	0.121212			2	2.35296	0.29412			0	0	0			0	0	0			0	0	0			0	0	0
mouse 985 26-1	10		80	0.125	0.390219		0	0	0	0.164657		1	1.26364	0.126364	0.160827		1	1.26364	0.126364	0.0421215		0	0	0	0		0	0	0	0
mouse 985 26-3	11		76	0.144737	0.130073	1.26364	1	1.26364	0.114877			2	2.52729	0.229754			0	0	0			0	0	0			0	0	0
mouse 985 28-2	10	10.3333	83	0.120482			3	3.79093	0.379093			1	1.26364	0.126364			0	0	0			0	0	0			0	0	0
NogoOMgpMAG tKO
mouse 773-1	10		76	0.131579	0.774009		2	3.39771	0.339771	0.108109	0.110529	0	0	0	0.0540544	0.062455	1	1.69885	0.169885	0.108109	0.0726312	0	0	0	0	0	0	0	0	0	0
mouse 773-2	11		80	0.1375	0.0967511	1.69885	0	0	0		0.0276322	0	0	0		0.0156138	1	1.69885	0.154441		0.0181578	0	0	0			0	0	0
mouse 773-3	10		59	0.169492			0	0	0			1	1.69885	0.169885			1	1.69885	0.169885			0	0	0			0	0	0
mouse 773-4	11		105	0.104762			1	1.69885	0.154441			0	0	0			0	0	0			0	0	0			0	0	0
mouse 773-5	11		92	0.119565			1	1.69885	0.154441			1	1.69885	0.154441			1	1.69885	0.154441			0	0	0			0	0	0
mouse 773-6	6	9.83333	54	0.111111			0	0	0			0	0	0			0	0	0			0	0	0			0	0	0
mouse 964 19-1	11		107	0.102804	0.539398		0	0	0	0.109316		0	0	0	0.0277019		0	0	0	0		0	0	0	0		0	0	0
mouse 964 15-1	13		91	0.142857	0.10788	1.52361	1	1.52361	0.1172			0	0	0			0	0	0			0	0	0			0	0	0
mouse 964 22-2	11		114	0.0964912			2	3.04721	0.277019			1	1.52361	0.13851			0	0	0			0	0	0			0	0	0
mouse 964 13-2	9		80	0.1125			0	0	0			0	0	0			0	0	0			0	0	0			0	0	0
mouse 964 24-1	10	10.8	118	0.0847458			1	1.52361	0.152361			0	0	0			0	0	0			0	0	0			0	0	0
mouse 966 9-1	10		64	0.15625	0.675661		1	1.21633	0.121633	0.0243267		0	0	0	0		0	0	0	0		0	0	0	0		0	0	0
mouse 966 18-1	11		92	0.119565	0.135132	1.21633	0	0	0			0	0	0			0	0	0			0	0	0			0	0	0
mouse 966 3-1	7		53	0.132075			0	0	0			0	0	0			0	0	0			0	0	0			0	0	0
mouse 966 1-2	8		52	0.153846			0	0	0			0	0	0			0	0	0			0	0	0			0	0	0
mouse 966 13-1	9	9	79	0.113924			0	0	0			0	0	0			0	0	0			0	0	0			0	0	0
NogoOMgpMAG tKO + ChABC
mouse 009 slide 32	8		62	0.129032			1	1.2336	0.1542			0	0	0			0	0	0			0	0	0			0	0	0
mouse 009 slide 40	8		59	0.135593	0.666203		0	0	0	0.161365	0.103462	1	1.2336	0.1542	0.106538	0.101378	0	0	0	0.0308401	0.0689605	0	0	0	0	0	0	0	0	0	0
mouse 009 slide 46	11		75	0.146667	0.133241	1.2336	2	2.46721	0.224291		0.0462698	2	2.46721	0.224291		0.0453376	0	0	0		0.0308401	0	0	0			0	0	0
mouse 009 slide 55	9		64	0.140625			2	2.46721	0.274134		0.185102	0	0	0		0	0	0	0		0.794134	0	0	0			0	0	0
mouse 009 slide 59	8	8.8	70	0.114286			1	1.2336	0.1542		0.119058	1	1.2336	0.1542		0.0785247	1	1.2336	0.1542			0	0	0			0	0	0
NogoOMgpMAG tKO + ChABC + conditioning lesion
mouse 277 14-1	7		65	0.107692	0.516866		1	1.59002	0.227146	0.120514	0.212606	0	0	0	0.0795012	0.140335	0	0	0	0	0	0	0	0	0	0	0	0	0	0	0
mouse 277 26-1	8		66	0.121212	0.103373	1.59002	1	1.59002	0.198753		0.0672318	0	0	0		0.0443777	0	0	0			0	0	0			0	0	0
mouse 277 28-3	8		83	0.0963855			0	0	0		0.0362204	2	3.18005	0.397506		0.168087	0	0	0			0	0	0			0	0	0
mouse 277 32-1	9		96	0.09375			1	1.59002	0.176669		0.0237683	0	0	0		0.0541293	0	0	0			0	0	0			0	0	0
mouse 277 38-1	9	8.2	92	0.0978261			0	0	0			0	0	0			0	0	0			0	0	0			0	0	0
mouse 319 17-2	9		85	0.105882	0.51303		1	1.60191	0.17799	0.386493		1	1.60191	0.17799	0.116965		0	0	0	0		0	0	0	0		0	0	0	0
mouse 319 9-3	7		47	0.148936	0.102606	1.60191	1	1.60191	0.228845			0	0	0			0	0	0			0	0	0			0	0	0
mouse 319 15-1	7		80	0.0875			2	3.20382	0.457689			1	1.60191	0.228845			0	0	0			0	0	0			0	0	0
mouse 319 19-2	9		103	0.0873786			2	3.20382	0.35598			1	1.60191	0.17799			0	0	0			0	0	0			0	0	0
mouse 319 25-3	9	8.2	108	0.0833333			4	6.40765	0.711961			0	0	0			0	0	0			0	0	0			0	0	0
NogoOMgpMAG tKO + ChABC + GDNF
mouse 31 29-3	8		48	0.166667	0.456621		13	14.0385	1.75481	1.76663	0.425602	16	17.2781	2.15977	2.02887	0.601978	15	16.1983	2.02478	1.23123	0.450412	3	3.23965	0.404957	0.465859	0.152967	0	0	0	0.178163	0.197623
mouse 31 36-1	9		73	0.123288	0.152207	1.07988	14	15.1184	1.67982		0.141867	18	19.4379	2.15977		0.200659	9	9.71896	1.07988		0.150137	5	5.39942	0.599936		0.0509889	2	2.15977	0.239974		0.0658744
mouse 31 36-3	11	9.33333	66	0.166667			19	20.5178	1.86525		4.20165e-06	18	19.4379	1.76708		0.000473837	6	6.4793	0.589028		0.000226743	4	4.31954	0.392685		2.21495e-05	3	3.23965	0.294514		0.00479321
mouse 32 24-1	9		72	0.125	0.726284		6	8.14719	0.905244	1.44457		6	8.14719	0.905244	0.884595		5	6.78933	0.75437	0.821344		3	4.0736	0.452622	0.438888		3	4.0736	0.452622	0.29256
mouse 32 25-1	9		76	0.118421	0.121047	1.35787	12	16.2944	1.81049			6	8.14719	0.905244			8	10.8629	1.20699			2	2.71573	0.301748			4	5.43146	0.603496
mouse 32 25-3	8		76	0.105263			13	17.6523	2.20653			5	6.78933	0.848666			5	6.78933	0.848666			4	5.43146	0.678933			2	2.71573	0.339466
mouse 32 26-1	10		75	0.133333			11	14.9365	1.49365			6	8.14719	0.814719			5	6.78933	0.678933			2	2.71573	0.271573			0	0	0
mouse 32 26-2	9		72	0.125			8	10.8629	1.20699			8	10.8629	1.20699			4	5.43146	0.603496			2	2.71573	0.301748			1	1.35787	0.150874
mouse 32 43-2	13	9.66667	109	0.119266			10	13.5787	1.04451			6	8.14719	0.626707			8	10.8629	0.83561			6	8.14719	0.626707			2	2.71573	0.208902
NogoOMgpMAG tKO + conditioning lesion
mouse 83 20-2	8		55	0.145455	0.695906		1	1.18095	0.147619	0.191201	0.0949935	0	0	0	0	0.0662037	0	0	0	0	0	0	0	0	0	0	0	0	0	0	0
mouse 83 40-1	8		66	0.121212	0.139181	1.18095	2	2.3619	0.295237		0.0286416	0	0	0		0.0199612	0	0	0			0	0	0			0	0	0
mouse 83 16-1	6		45	0.133333			1	1.18095	0.196825		0.00378775	0	0	0		0.976716	0	0	0			0	0	0			0	0	0
mouse 83 16-2	7		45	0.155556			1	1.18095	0.168707		0.00066859	0	0	0		0.167933	0	0	0			0	0	0			0	0	0
mouse 83 38-2	8	7.4	57	0.140351			1	1.18095	0.147619			0	0	0			0	0	0			0	0	0			0	0	0
mouse 161 34-2	6		49	0.122449	0.809226		2	2.43738	0.40623	0.225844		0	0	0	0.0544058		0	0	0	0		0	0	0	0		0	0	0	0
mouse 161 46-2	8		63	0.126984	0.134871	1.21869	1	1.21869	0.152336			1	1.21869	0.152336			0	0	0			0	0	0			0	0	0
mouse 161 19-2	7		42	0.166667			1	1.21869	0.174098			0	0	0			0	0	0			0	0	0			0	0	0
mouse 161 35-2	7		57	0.122807			2	2.43738	0.348197			1	1.21869	0.174098			0	0	0			0	0	0			0	0	0
mouse 161 41-1	8		60	0.133333			1	1.21869	0.152336			0	0	0			0	0	0			0	0	0			0	0	0
mouse 161 47-3	10	7.66667	73	0.136986			1	1.21869	0.121869			0	0	0			0	0	0			0	0	0			0	0	0
NogoOMgpMAG tKO + GDNF
mouse 720 7-1	7		75	0.0933333	0.663584		10	17.3386	2.47694	1.78989	0.629888	6	10.4032	1.48617	2.13194	1.10586	0	0	0	0.0495389	1.10132	0	0	0	0	0.271484	0	0	0	0	0.235144
mouse 720 2-1	6		66	0.0909091	0.0947977	1.73386	8	13.8709	2.31181		0.157472	15	26.0079	4.33465		0.276465	0	0	0		0.275331	0	0	0		0.067871	0	0	0		0.058786
mouse 720 5-1	7		69	0.101449			5	8.6693	1.23847		6.75913e-05	13	22.5402	3.22003		0.00074329	1	1.73386	0.346772		0.0732014	0	0	0		0.257007	0	0	0		0.285461
mouse 720 6-1	7		68	0.102941			7	12.137	1.73386			12	20.8063	2.97233			0	0	0			0	0	0			0	0	0
mouse 720 6-3	8		85	0.0941176			6	10.4032	1.30039			10	17.3386	2.16732			0	0	0			0	0	0			0	0	0
mouse 720 8-2	7		75	0.0933333			7	12.137	1.73386			0	0	0			0	0	0			0	0	0			0	0	0
mouse 720 10-1	7	7	80	0.0875			7	12.137	1.73386			3	5.20158	0.743083			0	0	0			0	0	0			0	0	0
mouse 733 8-3	5		47	0.106383	1.27734		7	8.10674	1.62135	0.87486		8	9.26484	1.85297	1.21591		7	8.10674	1.15811	1.42833		3	3.47432	0.694863	0.379754		4	4.63242	0.926484	0.16192
mouse 733 12-1	8		56	0.142857	0.141927	1.15811	5	5.79053	0.723816			9	10.4229	1.30287			6	6.94863	1.38973			3	3.47432	0.434289			0	0	0
mouse 733 13-3	9		62	0.145161			3	3.47432	0.386035			10	11.5811	1.28678			9	10.4229	3.47432			2	2.31621	0.257357			2	2.31621	0.257357
mouse 733 15-1	8		57	0.140351			4	4.63242	0.579053			10	11.5811	1.44763			11	12.7392	3.18479			3	3.47432	0.434289			1	1.15811	0.144763
mouse 733 18-3	9		62	0.145161			6	6.94863	0.77207			11	12.7392	1.41546			6	6.94863	1.15811			4	4.63242	0.514713			1	1.15811	0.128678
mouse 733 20-1	8		62	0.129032			10	11.5811	1.44763			10	11.5811	1.44763			9	10.4229	1.04229			1	1.15811	0.144763			0	0	0
mouse 733 25-3	9		65	0.138462			6	6.94863	0.77207			4	4.63242	0.514713			5	5.79053	0.965088			6	6.94863	0.77207			0	0	0
mouse 733 31-2	7		42	0.166667			6	6.94863	0.992662			4	4.63242	0.661774			1	1.15811	0.193018			1	1.15811	0.165444			0	0	0
mouse 733 37-2	8	7.88889	49	0.163265			4	4.63242	0.579053			7	8.10674	1.01334			1	1.15811	0.289526			0	0	0			0	0	0
